# Supplementary material for: Green preparation of fluorescent carbon dots from lychee seeds and their application for the selective detection of methylene blue and imaging in living cells
Source: Royal Society of Chemistry journal article supplement (doi:10.1039/c5tb01073j), 2015-01-01
Supplement: c5tb01073j1.pdf [file c5tb01073j1.pdf]

## **Electronic Supplementary Information (ESI)**

### **Green preparation of fluorescent carbon dots from lychee seed and its application for selective detection of methylene blue and imaging in living cells**

Mingyue Xue,<sup>ab</sup> Mengbing Zou,<sup>a</sup> Jingjin Zhao,<sup>\*a</sup> Zhihua Zhan<sup>ab</sup> and Shulin Zhao<sup>\*a</sup>

- a Key Laboratory for the Chemistry and Molecular Engineering of Medicinal Resources (Ministry of Education), College of Chemistry and Pharmacy, Guangxi Normal University, Guilin, 541004, China
- b Guilin Normal College, Guilin, 541001, China.

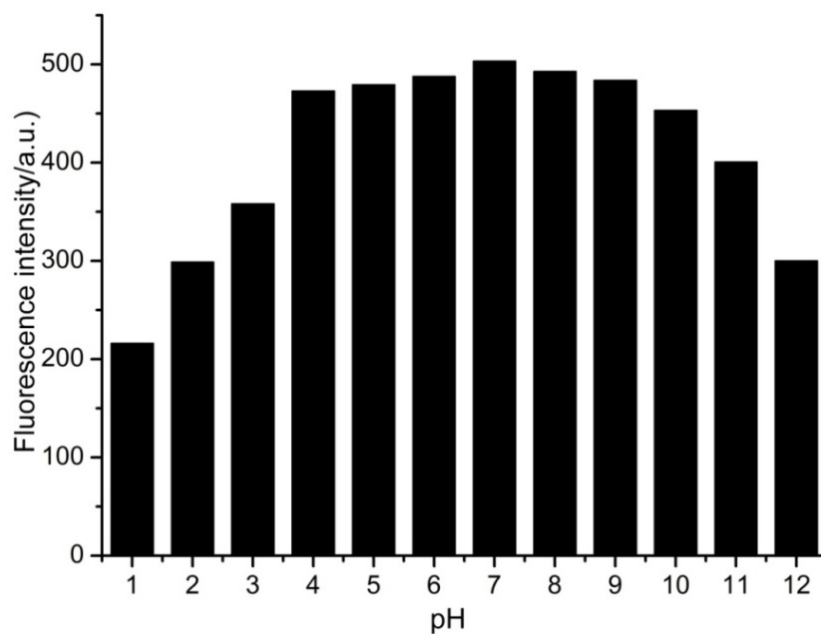

**Fig. S1** Effect of pH value on the fluorescence intensity of the as-prepared CDs.

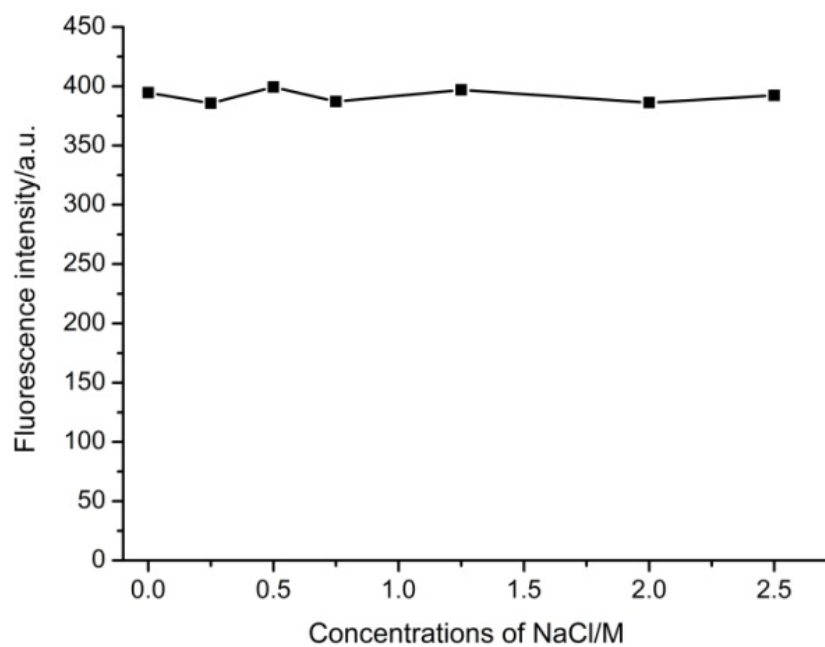

**Fig. S2** Fluorescence intensity of as-prepared CDs in pH 7.4 PB solution after adding various concentrations of NaCl solutions.

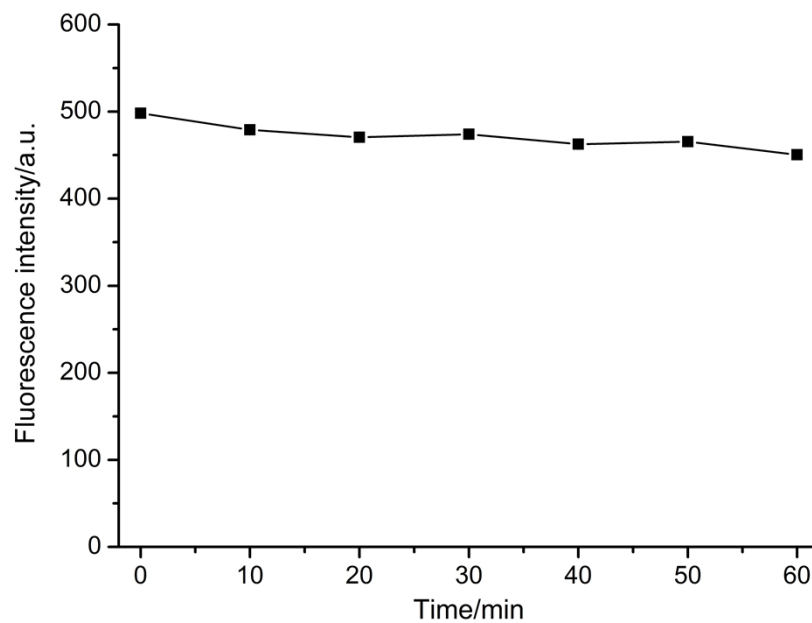

**Fig. S3** The fluorescence intensity variation of the CDs under 365 nm UV light illumination.

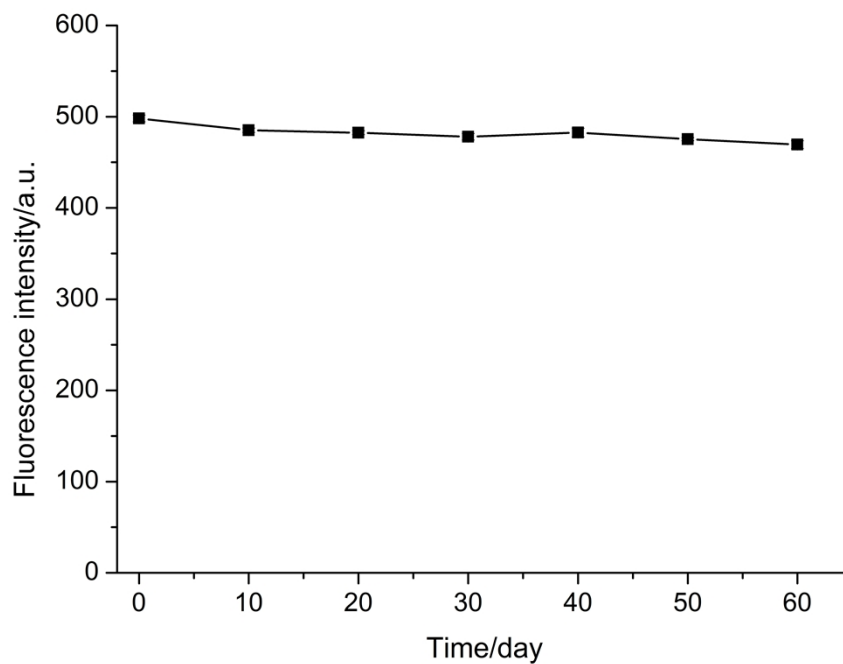

**Fig. S4** The fluorescence intensity variation of the as-prepared CDs with storage time.

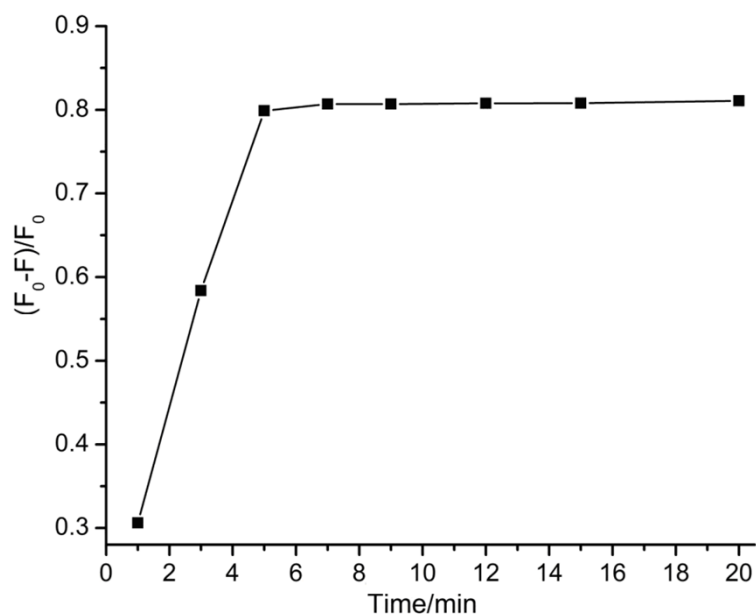

**Fig. S5** Time-dependent fluorescence response of the CDs to 50  $\mu$ M methylene blue in pH 8.0.

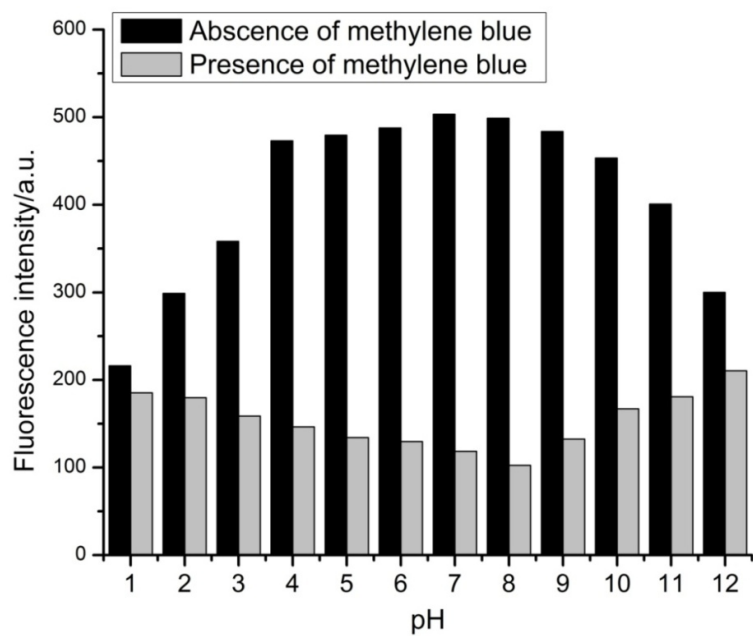

**Fig. S5** Effect of the solution pH value on the fluorescence intensity of CDs in the absence and presence of 50  $\mu$ M methylene blue.

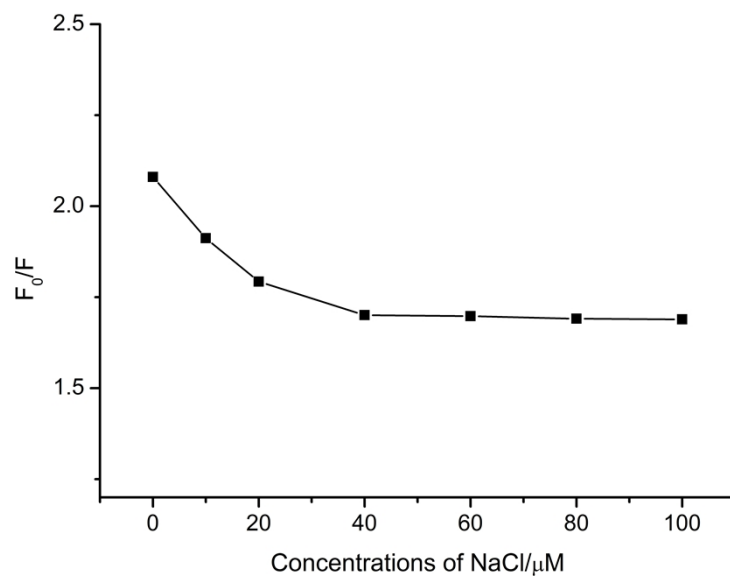

**Fig. S7** Effect of NaCl on the fluorescence quenching of CDs. (the concentrations of CDs:  $10 \text{ g mL}^{-1}$ ; the concentrations of methylene blue:  $6 \text{ }\mu\text{M}$ .)

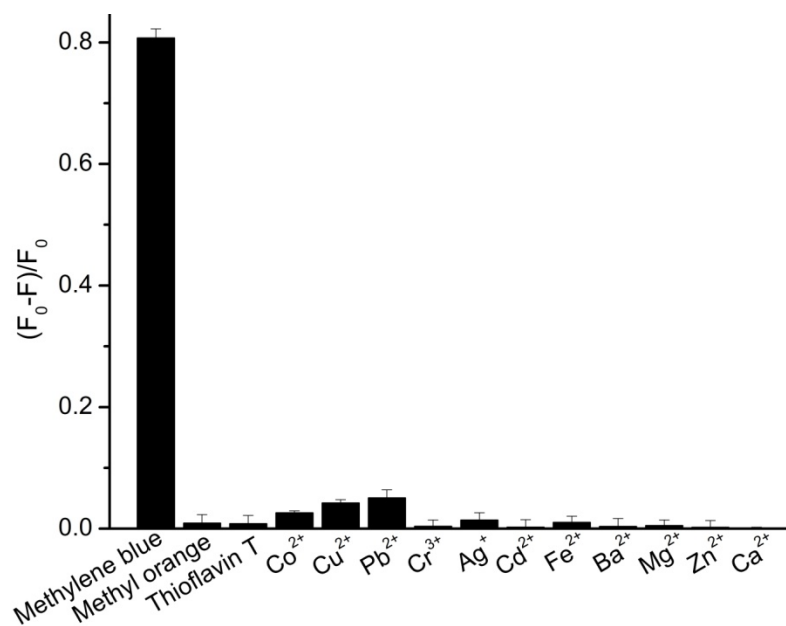

**Fig. S8** Comparison of quenching efficiency of CDs after the addition of different substances (concentrations of all substances were  $10 \text{ }\mu\text{M}$ ).

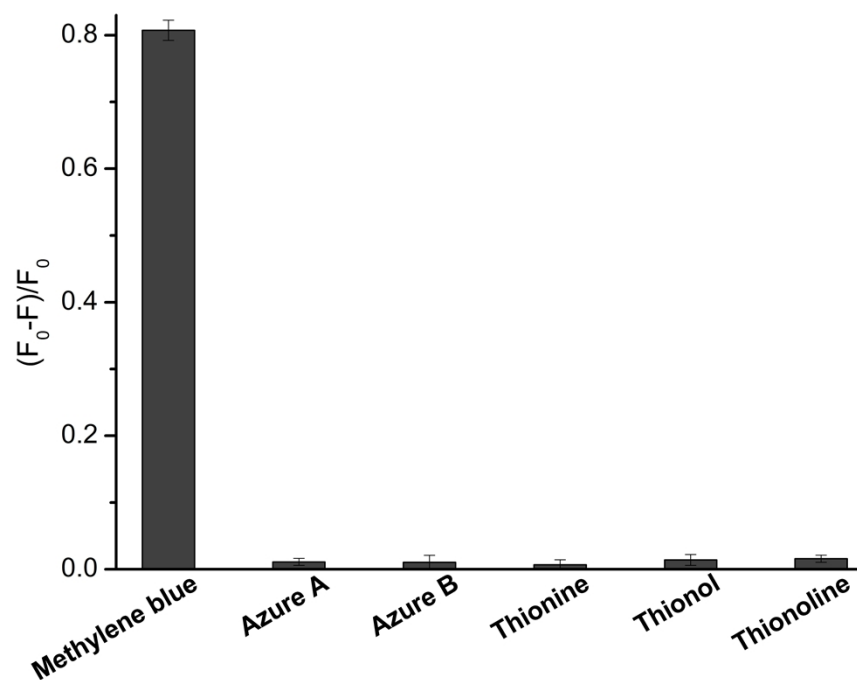

**Fig. S9** Comparison of quenching efficiency of CDs after the addition of methylene blue and its possible oxidation products (concentrations of all substances were 10  $\mu$ M).

**Table 1.** Comparison of the assay performance of the proposed strategy with other methods.

| Methods                                                               | Linear range                      | Limit of detection    | References |
|-----------------------------------------------------------------------|-----------------------------------|-----------------------|------------|
| Capillary electrophoresis                                             | 1.0-60 µg/mL                      | 1.0 µg/mL             | 1          |
| Cation exchange chromatography coupled to tandem mass spectrometry    | 75 ng/mL-10 µg/mL                 | 75 ng/mL              | 2          |
| Capillary electrophoresis / electrospray ionization mass spectrometry | 0.5-8.0 µg/mL                     | 0.22 µg/mL            | 3          |
| Liquid chromatography-tandem mass spectrometry                        | 1-1000 ng/mL                      | 1 ng/mL               | 4          |
| Electrochemical assay                                                 | 10 nM-1.0 µM                      | 4.1 nM                | 5          |
| A silver nanoparticle-modified evanescent field optical fiber sensor  | 0-0.4 mM                          | 0.03 mM               | 6          |
| Carbon dots-based fluorescence assay                                  | 0.2-10 µM<br>(64 ng/mL-3.2 µg/mL) | 0.05 µM<br>(16 ng/mL) | This work  |

1. H. Borwitzky, W. E. Haefeli and J. Burhenne, J. Chromatogr. B, 2005, 826, 244-251.
2. J. Burhenne, K. Riedel, J. Rengelshausen, P. Meissner, O. Müller, G. Mikus, W. E. Haefeli and I. Walter-Sack, J. Chromatogr. B, 2008, 863, 273-282.
3. F. Yang, S. Xia, Z. Liu, J. Chen, Y. Lin, B. Qiu and G. Chen, Electrophoresis, 2011, 32, 65-664.
4. S. Kim, D. Ha and T. Koo, Biomed. Chromatogr., 2014; 28, 518-524.
5. Y. He, L. Ding and B. Su, Sci. China: Chem., 2015, DOI: 10.1007/s11426-015-5365-2.
6. J. Luo, J. Yao, Y. Lu, W. Ma and X. Zhuang, Sensors, 2013, 13, 3986-3997.
